# Supplementary material
Source: ML conference proceedings conference paper supplement (https://proceedings.neurips.cc/paper_files/paper/2021/hash/abf0931987f2f8eb7a8d26f2c21fe172-Abstract.html)
Supplement: Supplementary file 1 [file abf0931987f2f8eb7a8d26f2c21fe172-Supplemental.zip]

Archive with 3 entries (3 files):
- algorithms.py
- appendix.pdf
- experiments.py
